# Supplementary material
Source: MDPI journal article supplement (https://www.mdpi.com/2077-1312/9/9/948)
Supplement: s1 [file s1 › jmse-1329325-supplementary.pdf]

**Table S1.** Regulatory and institutional framework with competences in the coastal zone, as well as its management and planning instruments.

| Institution                                                                                                                                                                    | Regulatory Reference                                                                                                                                                                                                  | Planning and Management Tools                                                                                                                                                                                                                                                              |
|--------------------------------------------------------------------------------------------------------------------------------------------------------------------------------|-----------------------------------------------------------------------------------------------------------------------------------------------------------------------------------------------------------------------|--------------------------------------------------------------------------------------------------------------------------------------------------------------------------------------------------------------------------------------------------------------------------------------------|
| Ministry of National Defense.<br>Undersecretariat for the Armed Forces.<br>National Commission on Coastal Edge Use (CNUBC) and Regional Commission on Coastal Edge Use (CRUBC) | Supreme Decree 475 (1994), National Policy on Coastal Edge Use (PNUBC)                                                                                                                                                | Coastal Edge Use Zoning (ZUBC): coastal zone ordination and management                                                                                                                                                                                                                     |
| Ministry of National Defense.<br>Undersecretariat for the Armed Forces.<br>DIRECTEMAR (General Directorate of the Maritime Territory and the Merchant Marine)                  | Legislative Decree 340 (1960) on Maritime Concessions.<br>Navigation Law, 2.222 (1978).<br>D.S 320 (2001), Environmental Regulation of aquaculture.<br>D.S 1 (1992), Regulation for the control of aquatic pollution. | Concessions for the use of the coastal zone.<br>Maritime Governorships and Harbour Master Offices.<br>Research, surveillance and control plan for aquatic pollution.<br>Coastal Environment Observation Program.<br>Program for the Dissemination of Environmental and Maritime Awareness. |
| Ministry of Lands and Colonization                                                                                                                                             | Legislative Decree 1.939 (1977), on Norms on Acquisition, Administration and Disposal of State Assets                                                                                                                 | Coastal Edge Administration                                                                                                                                                                                                                                                                |
| Ministry of Economy, Development and Tourism. SUBPESCA (Undersecretary of Fisheries and Aquaculture). SERNAPESCA (National Fisheries and Aquaculture Service)                  | General Law 18.892 (1989) on Fisheries and Aquaculture from (modification of Law No. 20.657- 2013)<br>Legislative Decree 1 (2014), restructuring of SERNAPESCA                                                        | Fishery unit management plans.<br>Suitable areas for aquaculture. Vulnerable Marine Ecosystems. Marine Protected Areas (MPAs). Benthic Resources Management and Exploitation Area (AMERB)                                                                                                  |
| Ministry of the General Secretariat of the Presidency                                                                                                                          | Law 19.300 (1994), on General Bases of the Environment<br>Law 20.417 (2010) creates the Ministry of Environment, the Environmental Assessment System, and the Superintendence of Environment                          | Creation of the National Environmental Commission (CONAMA)<br>National Strategy for the Conservation and Sustainable Use of Wetlands (2005)<br>National Wetlands Committee (2005)<br>CONAMA functions are transferred to the MMA (2010)                                                    |

|                                                                                                           |                                                                                                                                                                                                                                                                                                                                               |                                                                                                                                                                                                                                   |
|-----------------------------------------------------------------------------------------------------------|-----------------------------------------------------------------------------------------------------------------------------------------------------------------------------------------------------------------------------------------------------------------------------------------------------------------------------------------------|-----------------------------------------------------------------------------------------------------------------------------------------------------------------------------------------------------------------------------------|
| Ministry of Environment (MMA)                                                                             | Supreme Decree 40 (2012), approves regulation of Environmental Impact Assessment System (SEIA).<br>Decree 32 (2015), approves regulation of Strategic Environmental Assessment (EAE).<br>Supreme Decree 14 (2018), approves the National Biodiversity Strategy 2017-2030<br>Law No. 21.202 (2020), with the aim of protecting Urban Wetlands. | Environmental Impact Assessment System (SEIA).<br>Strategic Environmental Assessment (EAE)<br>Minimum Ecological Flow (2012)<br>National Biodiversity Strategy (2017-2030)<br>National Plan for Wetland Protection of (2018-2022) |
| Ministry of the Interior and Public Security<br>Undersecretary of Regional and Administrative Development | Law 21.074 (2018), Strengthening the Regionalization of the Country                                                                                                                                                                                                                                                                           | Regional Territorial Ordering Plan (PROT)                                                                                                                                                                                         |
| Ministry of Cultures.<br>National Monuments Council (CMN)                                                 | Law 17.288 (1970) on National Monuments, management of Cultural and Natural Heritage                                                                                                                                                                                                                                                          | National Monument<br>Public Historical Monuments<br>Nature Sanctuary                                                                                                                                                              |
| Ministry of Agriculture (MINAGRI).<br>National Forestry Corporation (CONAF)                               | Law 18.362 (1984), on the National System of Protected Wild Areas of the State (SNASPE),<br>Law 20.283 (2008), on Recovery of the Native Forest and Forest Development:<br>Decree 82 (2011), Regulation of Soils, Waters and Wetlands                                                                                                         | Management categories:<br>National Park<br>National Reserve<br>Natural Monument<br><br>National Program for the Conservation of Wetlands within SNASPE (2010)                                                                     |
| Ministry of Foreign Affairs                                                                               | Decree 259 (1980), ratifies the World Cultural and Natural Heritage Convention (UNESCO, 1972).<br><br>Supreme Decree 771 (1981), promulgates the Convention on Wetlands of International Importance especially as Habitat for Waterfowl (Ramsar Convention, 1971)                                                                             | 6 World Heritage Sites (UNESCO)<br>10 Biosphere Reserves (UNESCO)<br><br>16 Ramsar Sites                                                                                                                                          |
| Ministry of National Assets                                                                               | Legislative Decree 1939 (1977), on Acquisition, administration and disposal of State Assets                                                                                                                                                                                                                                                   | National Protected Assets                                                                                                                                                                                                         |
| Ministry of Justice                                                                                       | Legislative Decree 1.122 (1981), Water Code                                                                                                                                                                                                                                                                                                   | Concession of water use rights                                                                                                                                                                                                    |

---

|                                |                                          |                                             |
|--------------------------------|------------------------------------------|---------------------------------------------|
| Ministry of Public Works (MOP) | Law 19.145 (1992), for the protection of | National Strategy for Water Resources       |
| General Directorate of Water   | peatlands, <i>vegas</i> and wetlands.    | (2012-2025)                                 |
| (DGA)                          | Law 20.017 (2005), modifies the Water    | Protection and conservation of surface wa-  |
|                                | Code                                     | ters                                        |
|                                |                                          | Flow reserves                               |
|                                |                                          | Protection and conservation of groundwater  |
|                                |                                          | Protection and conservation of the aquifers |
|                                |                                          | that feed plains and wetlands               |

---
